# Supplementary material
Source: publisher figshare collection journal article supplement (https://tandf.figshare.com/ndownloader/files/37448454)
Supplement: Supplementary file 1 [file 37448454]

**Supplementary table 4: Eye abnormalities by ICD-10 reported in children with FASD/PAE**

| **ICD-10 code** | **Reported in children with FAS/FASD** | **Reported in children with PAE or FASD+PAE** |
| --- | --- | --- |
| **VII Diseases of the eye and adnexa** | | |
| H00-H06 Disorders of eyelid, lacrimal system & orbit |  |  |
| H10-H13 Disorders of conjunctiva |  |  |
| H15.9 Disorder of sclera, unspecified | ✓ | - |
| H16 Keratitis |  |  |
| H17 Corneal scars & opacities |  |  |
| H18 Other disorders of cornea |  |  |
| H19 Disorders of sclera & cornea in diseases classified elsewhere |  |  |
| H20 Iridocyclitis |  |  |
| H21 Other disorders of iris & ciliary body |  |  |
| H22 Disorders of iris & ciliary body in diseases classified elsewhere |  |  |
| H25 Senile cataract |  |  |
| H26.0 Infantile, juvenile & presenile cataract | ✓ | ✓ |
| H27 Other disorders of lens |  |  |
| H28 Cataract & other disorders of lens in diseases classified elsewhere |  |  |
| H30 Chorioretinal inflammation |  |  |
| H31.1 Choroidal degeneration | ✓ |  |
| H31.8 Other specified disorders of choroid |  | ✓ |
| H32 Chorioretinal disorders in diseases classified elsewhere |  |  |
| H33 Retinal detachments & breaks |  |  |
| H34 Retinal vascular occlusions |  |  |
| H35 Other retinal disorders |  |  |
| H36 Retinal disorders in diseases classified elsewhere |  |  |
| H40.9 Glaucoma, unspecified | ✓ |  |
| H42 Glaucoma in diseases classified elsewhere |  |  |
| H43 Disorders of vitreous body |  |  |
| H44.5 Degenerated conditions of the globe – Phthisis | ✓ |  |
| H45 Disorders of vitreous body & globe in diseases classified elsewhere |  |  |
| H46 Optic neuritis |  |  |
| H47.2 Optic atrophy | ✓ |  |
| H48 Disorders of optic [2nd] nerve & visual pathways in diseases classified elsewhere |  |  |
| H49 Paralytic strabismus |  |  |
| H50.0 Convergent concomitant strabismus – Esotropia | ✓ |  |
| H50.1 Divergent concomitant strabismus – Exotropia &  H51.1 Convergence insufficiency & excess | ✓ |  |
| H50.9 Strabismus, unspecified | ✓ | ✓ |
| H51 Other disorders of binocular movement |  |  |
| H52.1 Myopia | ✓ | ✓ |
| H52.2 Astigmatism | ✓ | ✓ |
| H52.3 Anisometropia & aniseikonia | ✓ |  |
| H52.7 Disorder of refraction, unspecified | ✓ | ✓ |
| H53.1 Subjective visual disturbance | ✓ |  |
| H53.5 Colour vision deficiencies | ✓ |  |
| H53.8 Other visual disturbances | ✓ | ✓ |
| H53.9 Visual disturbance, unspecified | ✓ |  |
| H54.1-54.3 No, mild, moderate or severe visual impairment, binocular | ✓ | ✓ |
| H54.9 Unspecified visual impairment (binocular) | ✓ | ✓ |
| H55 Nystagmus & other irregular eye movements | ✓ |  |
| H57 Other disorders of eye & adnexa |  |  |
| H58 Other disorders of eye & adnexa in diseases classified elsewhere |  |  |
| H59 Postprocedural disorders of eye & adnexa, not elsewhere classified |  |  |
| **XVII Congenital malformations, deformations and chromosomal abnormalities** | | |
| Q00-Q07 Congenital malformations of the nervous system |  |  |
| Q10.0 Congenital ptosis | ✓ | ✓ |
| Q10.1 Congenital ectropion |  | ✓ |
| Q10.3 Other congenital malformations of eyelid | ✓ | ✓ |
| Q10.7 Congenital malformation of orbit | ✓ |  |
| Q11.2 Microphthalmos | ✓ |  |
| Q12 Congenital lens malformations |  |  |
| Q13.0 Coloboma of iris | ✓ |  |
| Q13.3 Congenital corneal opacity | ✓ | ✓ |
| Q13.4 Other congenital corneal malformations | ✓ | ✓ |
| Q13.8 Other congenital malformations of anterior eye segment | ✓ | ✓ |
| Q13.9 Congenital malformation of anterior segment of eye, unspecified | ✓ | ✓ |
| Q14.0 Congenital malformation of vitreous humour | ✓ |  |
| Q14.2 Congenital malformation of optic disc | ✓ | ✓ |
| Q14.8 Other congenital malformations of posterior segment of eye | ✓ | ✓ |
| Q14.9 Congenital malformation of posterior segment of eye, unspecified | ✓ | ✓ |
| Q15.0 Congenital glaucoma | ✓ | ✓ |
| Q75.2 Hypertelorism [& other orbital measures] | ✓ |  |

FAS = fetal alcohol syndrome; FASD = fetal alcohol spectrum disorder; ICD-10 = 10th revision of the International Statistical Classification of Diseases and Related Health Problems; PAE = prenatal alcohol exposure.
